# Supplementary material
Source: PubMed Central journal article supplement (PMC2942027)
Supplement: sagmb1434_supplementary_0.pdf [file sagmb1434_supplementary_0.pdf]

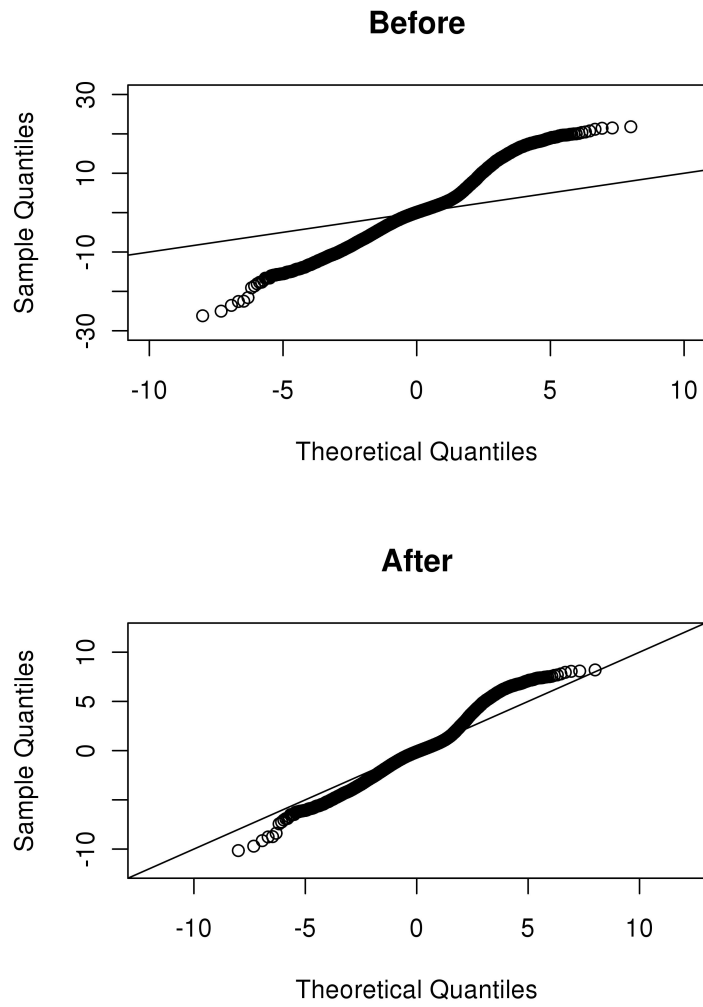

Figure S1: QQplots of moderated t-statistics before and after additional normalization in CiA data set for representative chromosome arm (3L). Theoretical quantiles are based on t-statistic quantiles using the moderated t-statistic degrees of freedom for CiA (8.69). See Methods for details.

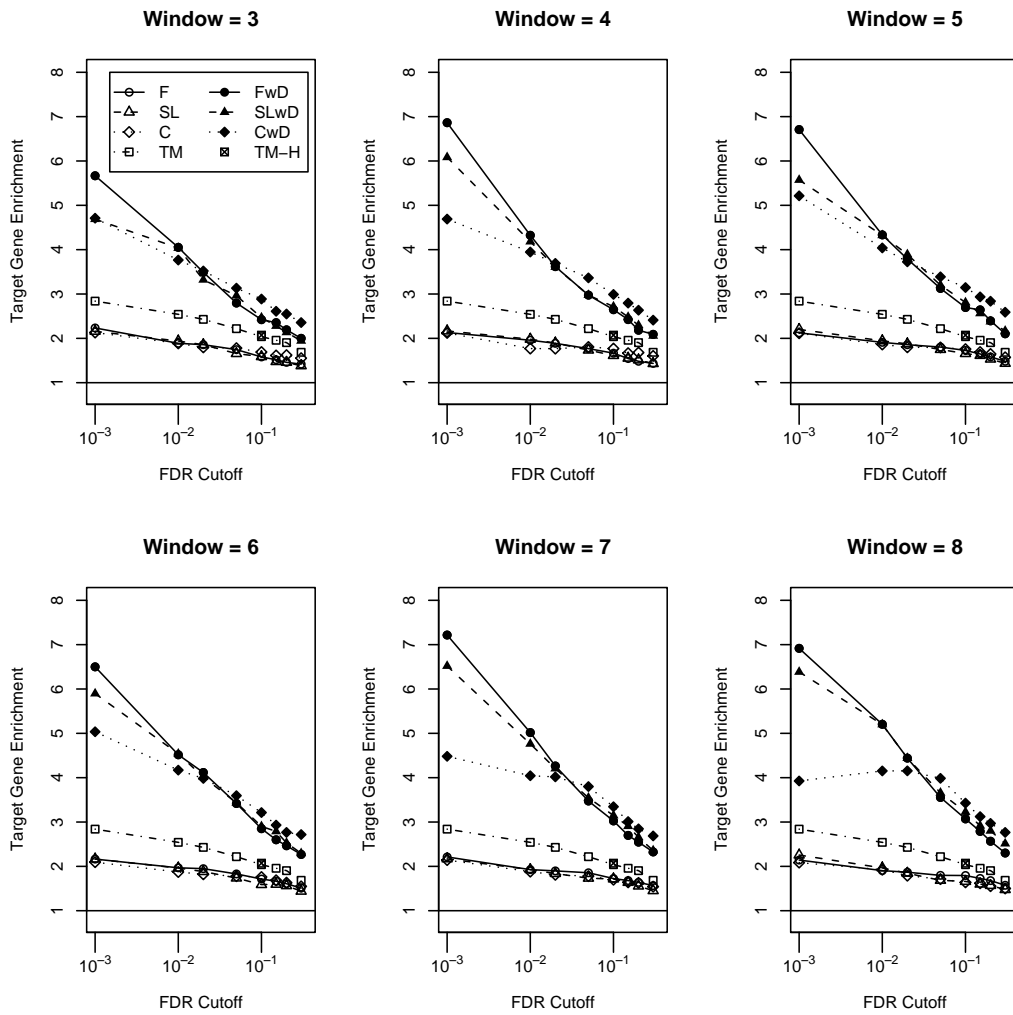

Figure S2: Target Gene Enrichment for All Window Sizes. See Figure 3 for details.

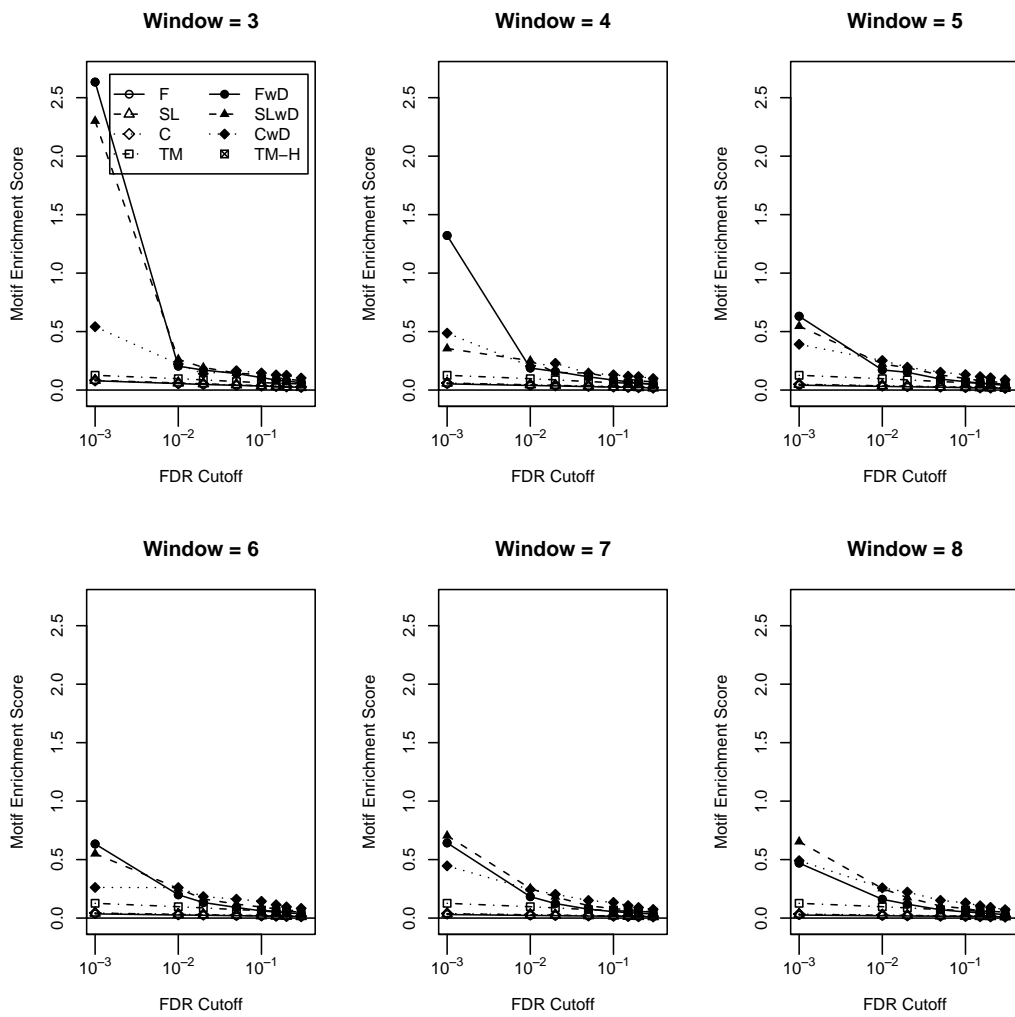

Figure S3: Motif Enrichment for All Window Sizes. See Figure 3 for details.

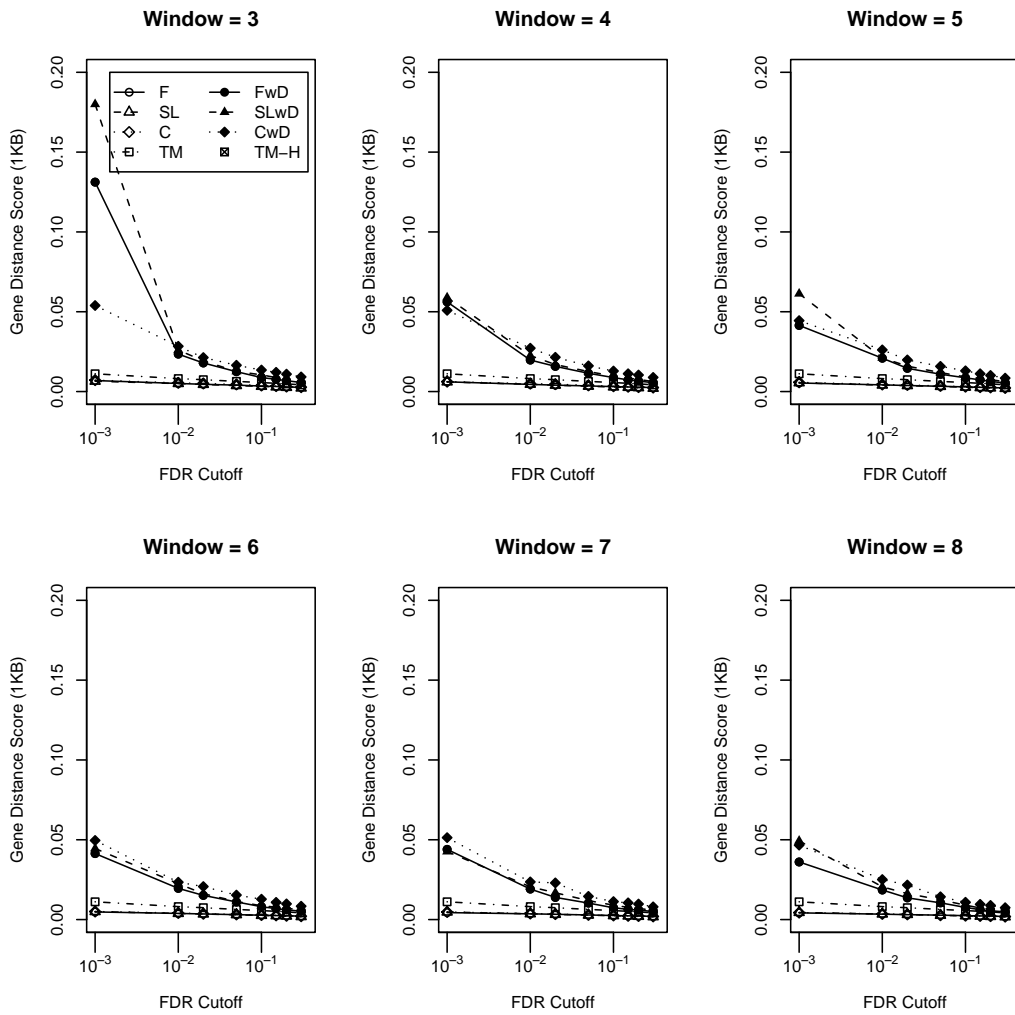

Figure S4: Gene Distance Score (1KB) for All Window Sizes. See Figure 4 for details.

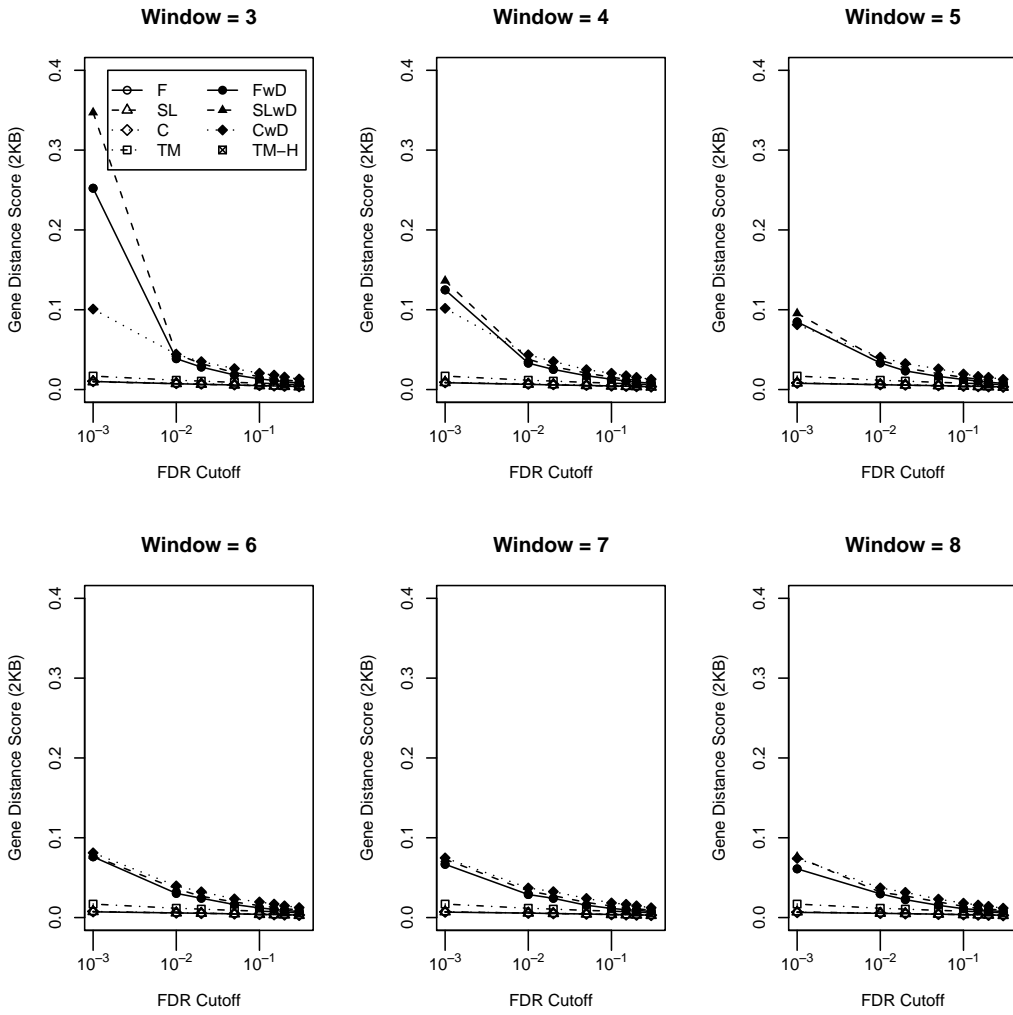

Figure S5: Gene Distance Score (2KB) for All Window Sizes. See Figure 4 for details.

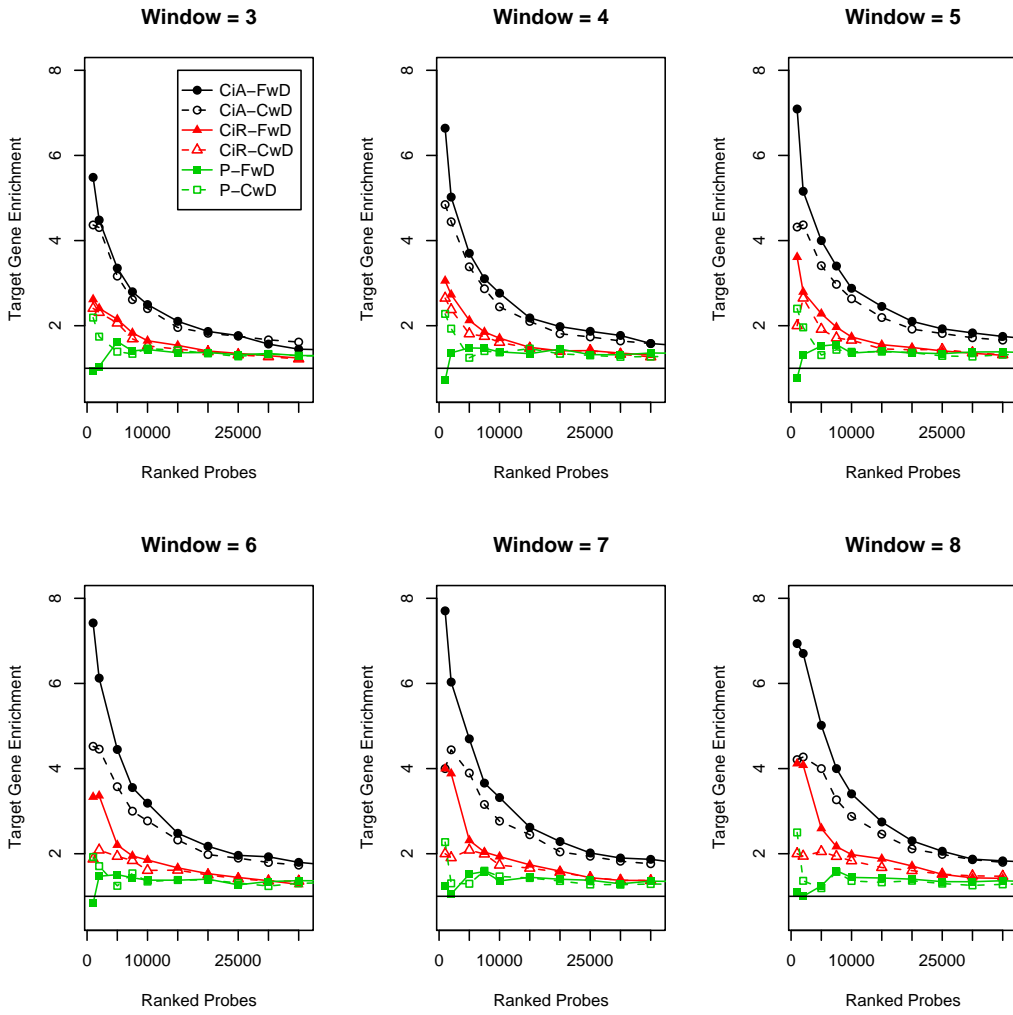

Figure S6: Target Gene for Top Predictions and All Window Sizes. See Figure 5 for details.

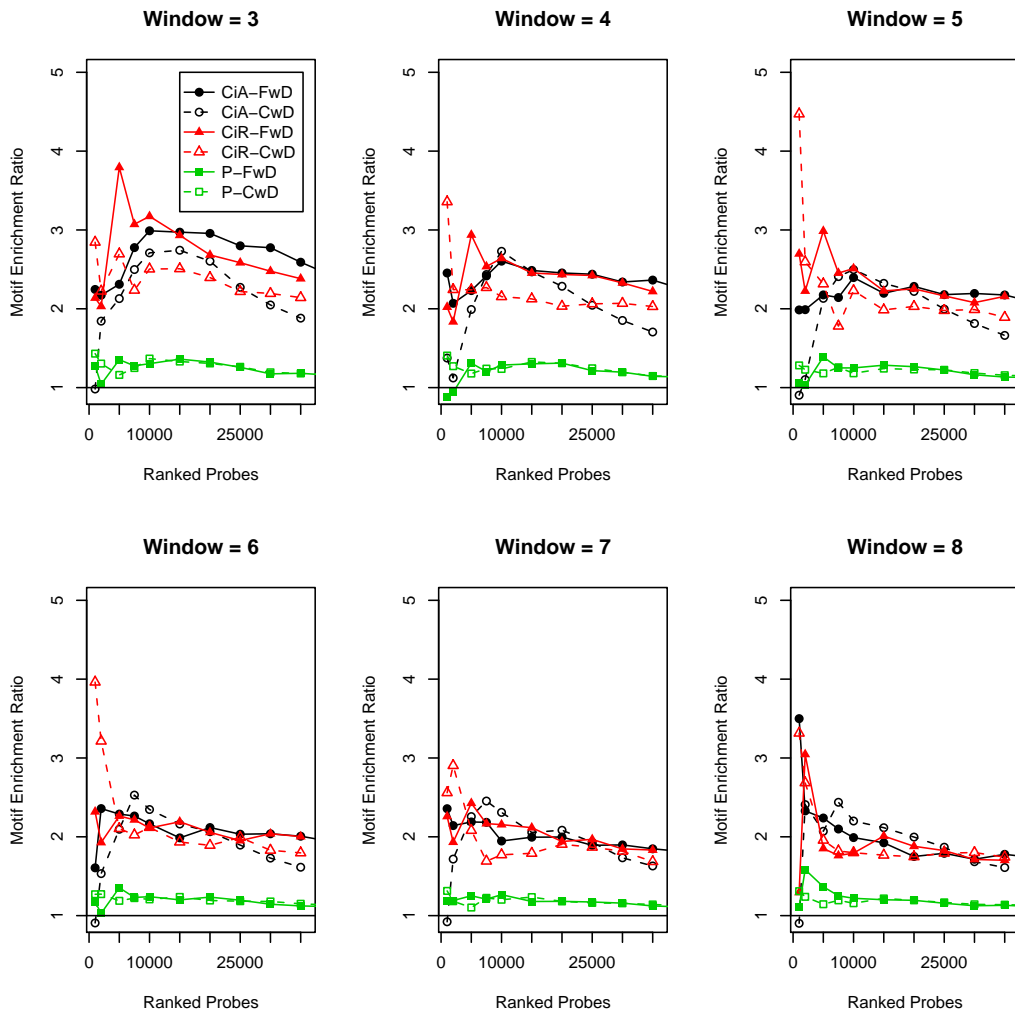

Figure S7: Motif Enrichment for Top Predictions and All Window Sizes. See Figure 5 for details.

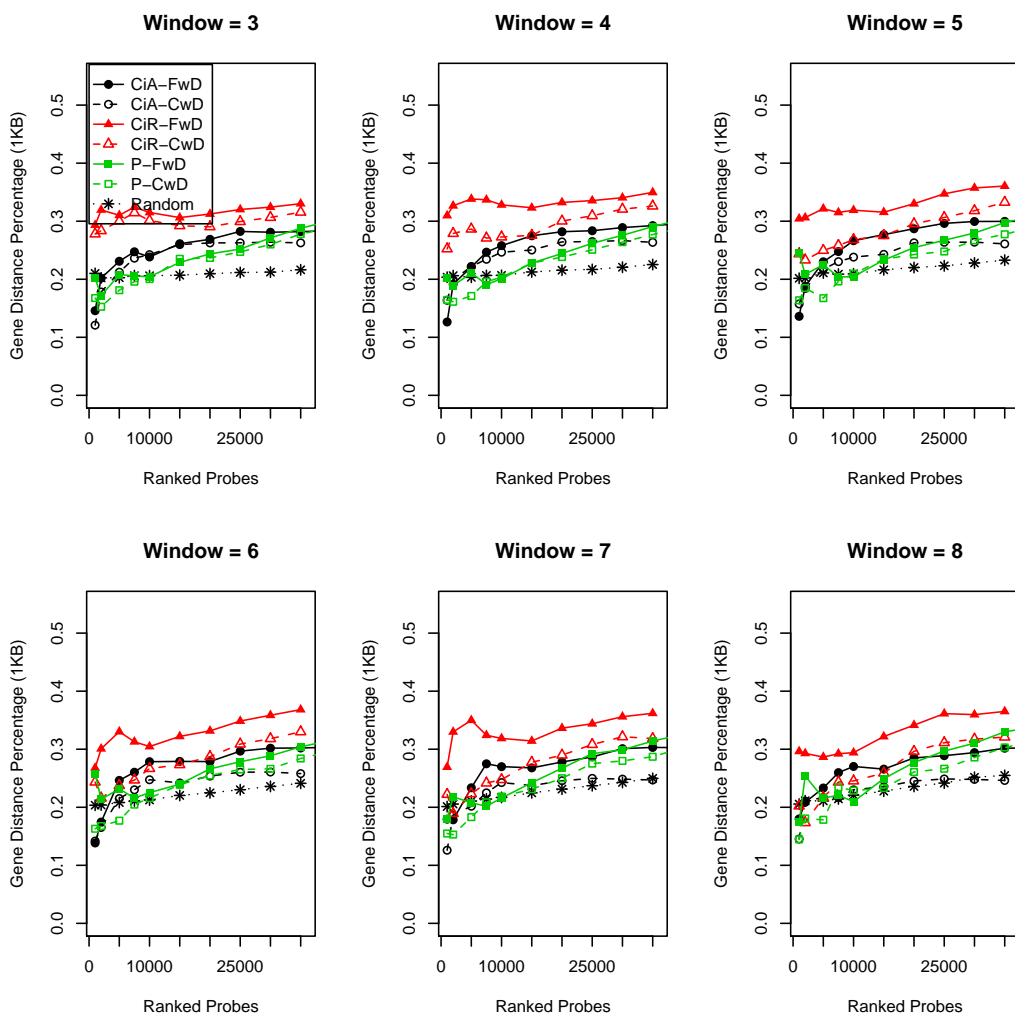

Figure S8: Gene Distance Score (1KB) for Top Predictions and All Window Sizes. See Figure 6 for details.



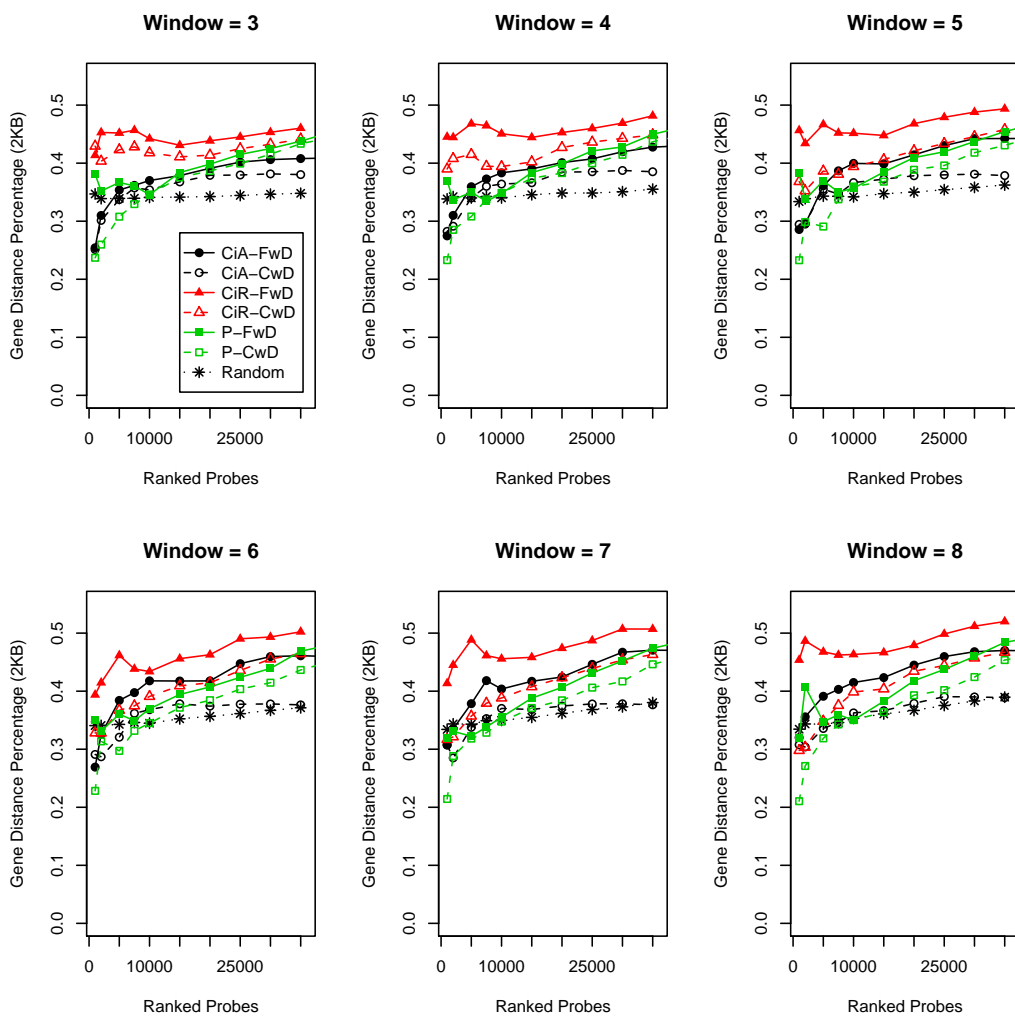

Figure S9: Gene Distance Score (2KB) for Top Predictions and All Window Sizes. See Figure 6 for details.

| GO Term    | # Gene List | # GO Term | Description                                                                         |
|------------|-------------|-----------|-------------------------------------------------------------------------------------|
| GO:0045165 | 56          | 227       | cell fate commitment                                                                |
| GO:0003700 | 57          | 303       | transcription factor activity                                                       |
| GO:0045449 | 76          | 523       | regulation of transcription                                                         |
| GO:0048513 | 113         | 1101      | organ development                                                                   |
| GO:0006350 | 82          | 633       | transcription                                                                       |
| GO:0010468 | 78          | 595       | regulation of gene expression                                                       |
| GO:0048731 | 125         | 1393      | system development                                                                  |
| GO:0019219 | 76          | 598       | regulation of nucleobase, nucleoside, nucleotide and nucleic acid metabolic process |
| GO:0031323 | 79          | 649       | regulation of cellular metabolic process                                            |
| GO:0050794 | 101         | 1007      | regulation of cellular process                                                      |
| GO:0019222 | 80          | 698       | regulation of metabolic process                                                     |
| GO:0007399 | 69          | 565       | nervous system development                                                          |
| GO:0048856 | 130         | 1685      | anatomical structure development                                                    |
| GO:0003002 | 56          | 407       | regionalization                                                                     |
| GO:0050789 | 113         | 1353      | regulation of biological process                                                    |
| GO:0007389 | 57          | 426       | pattern specification process                                                       |
| GO:0048646 | 40          | 235       | anatomical structure formation                                                      |
| GO:0003702 | 42          | 263       | RNA polymerase II transcription factor activity                                     |
| GO:0003677 | 69          | 632       | DNA binding                                                                         |
| GO:0065007 | 114         | 1459      | biological regulation                                                               |
| GO:0007275 | 132         | 1905      | multicellular organismal development                                                |
| GO:0009790 | 59          | 532       | embryonic development                                                               |
| GO:0005634 | 107         | 1420      | nucleus                                                                             |
| GO:0030154 | 90          | 1073      | cell differentiation                                                                |
| GO:0006355 | 49          | 390       | regulation of transcription, DNA-dependent                                          |
| GO:0009653 | 97          | 1218      | anatomical structure morphogenesis                                                  |
| GO:0048869 | 90          | 1105      | cellular developmental process                                                      |
| GO:0009887 | 63          | 617       | organ morphogenesis                                                                 |
| GO:0048737 | 36          | 240       | imaginal disc-derived appendage development                                         |
| GO:0006351 | 54          | 483       | transcription, DNA-dependent                                                        |
| GO:0032774 | 54          | 484       | RNA biosynthetic process                                                            |
| GO:0007165 | 65          | 662       | signal transduction                                                                 |
| GO:0048736 | 36          | 243       | appendage development                                                               |
| GO:0007154 | 75          | 856       | cell communication                                                                  |
| GO:0035114 | 35          | 237       | imaginal disc-derived appendage morphogenesis                                       |
| GO:0035107 | 35          | 240       | appendage morphogenesis                                                             |
| GO:0032502 | 136         | 2243      | developmental process                                                               |
| GO:0001709 | 37          | 118       | cell fate determination                                                             |
| GO:0032501 | 140         | 2373      | multicellular organismal process                                                    |
| GO:0007166 | 52          | 497       | cell surface receptor linked signal transduction                                    |
| GO:0006139 | 92          | 1303      | nucleobase, nucleoside, nucleotide and nucleic acid metabolic process               |
| GO:0022008 | 40          | 346       | neurogenesis                                                                        |
| GO:0001708 | 27          | 69        | cell fate specification                                                             |
| GO:0048699 | 39          | 336       | generation of neurons                                                               |
| GO:0007444 | 55          | 600       | imaginal disc development                                                           |
| GO:0035220 | 31          | 233       | wing disc development                                                               |
| GO:0007423 | 47          | 471       | sensory organ development                                                           |
| GO:0006366 | 30          | 221       | transcription from RNA polymerase II promoter                                       |
| GO:0050793 | 28          | 199       | regulation of developmental process                                                 |
| GO:0043231 | 126         | 2283      | intracellular membrane-bound organelle                                              |

Table S1: Significant GO terms for genes associated with CiA-CiR ERs. Columns list the significant GO terms (p-value < 10<sup>-20</sup>), number of ER genes in the GO term, number of total genes in the GO term and GO term description.
